# Supplementary material for: Study on the Immune Escape Mechanism of Acute Myeloid Leukemia With DNMT3A Mutation
Source: Front Immunol. 2021 May 20;12:653030. doi: 10.3389/fimmu.2021.653030 (PMC8173207; doi:10.3389/fimmu.2021.653030)
Supplement: Supplementary file 1 [file DataSheet_1.docx]

**Supplementary Appendix**

This appendix is provided by the authors for additional information about their work.

Supplements to Yimei Que*, et al.*Study on the immune escape mechanism of acute myeloid leukemia with DNMT3A mutation

**SUPPLEMENTAL MATERIALS**

**CONTENTS:**

**Supplementary figures**

Figure S1. The apoptosis rate of SKM-1control, SKM-1KO, SKM-1NC, SKM-1R882H SC1 and SKM-1R882H SC2 treated with different concentration of cytarabine.

Figure S2. DNMT3A mRNA expression levels in SKM-1WT, SKM-1control and SKM-1KO clones.

Figure S3. The time gradients and E: T gradients in vitro co-culture.

Figure S4.The expression of CD86 and CD206 in macrophages after co-cultured with SKM-1control, SKM-1KO, SKM-1NC, SKM-1R882H SC1 and SKM-1R882H SC2.


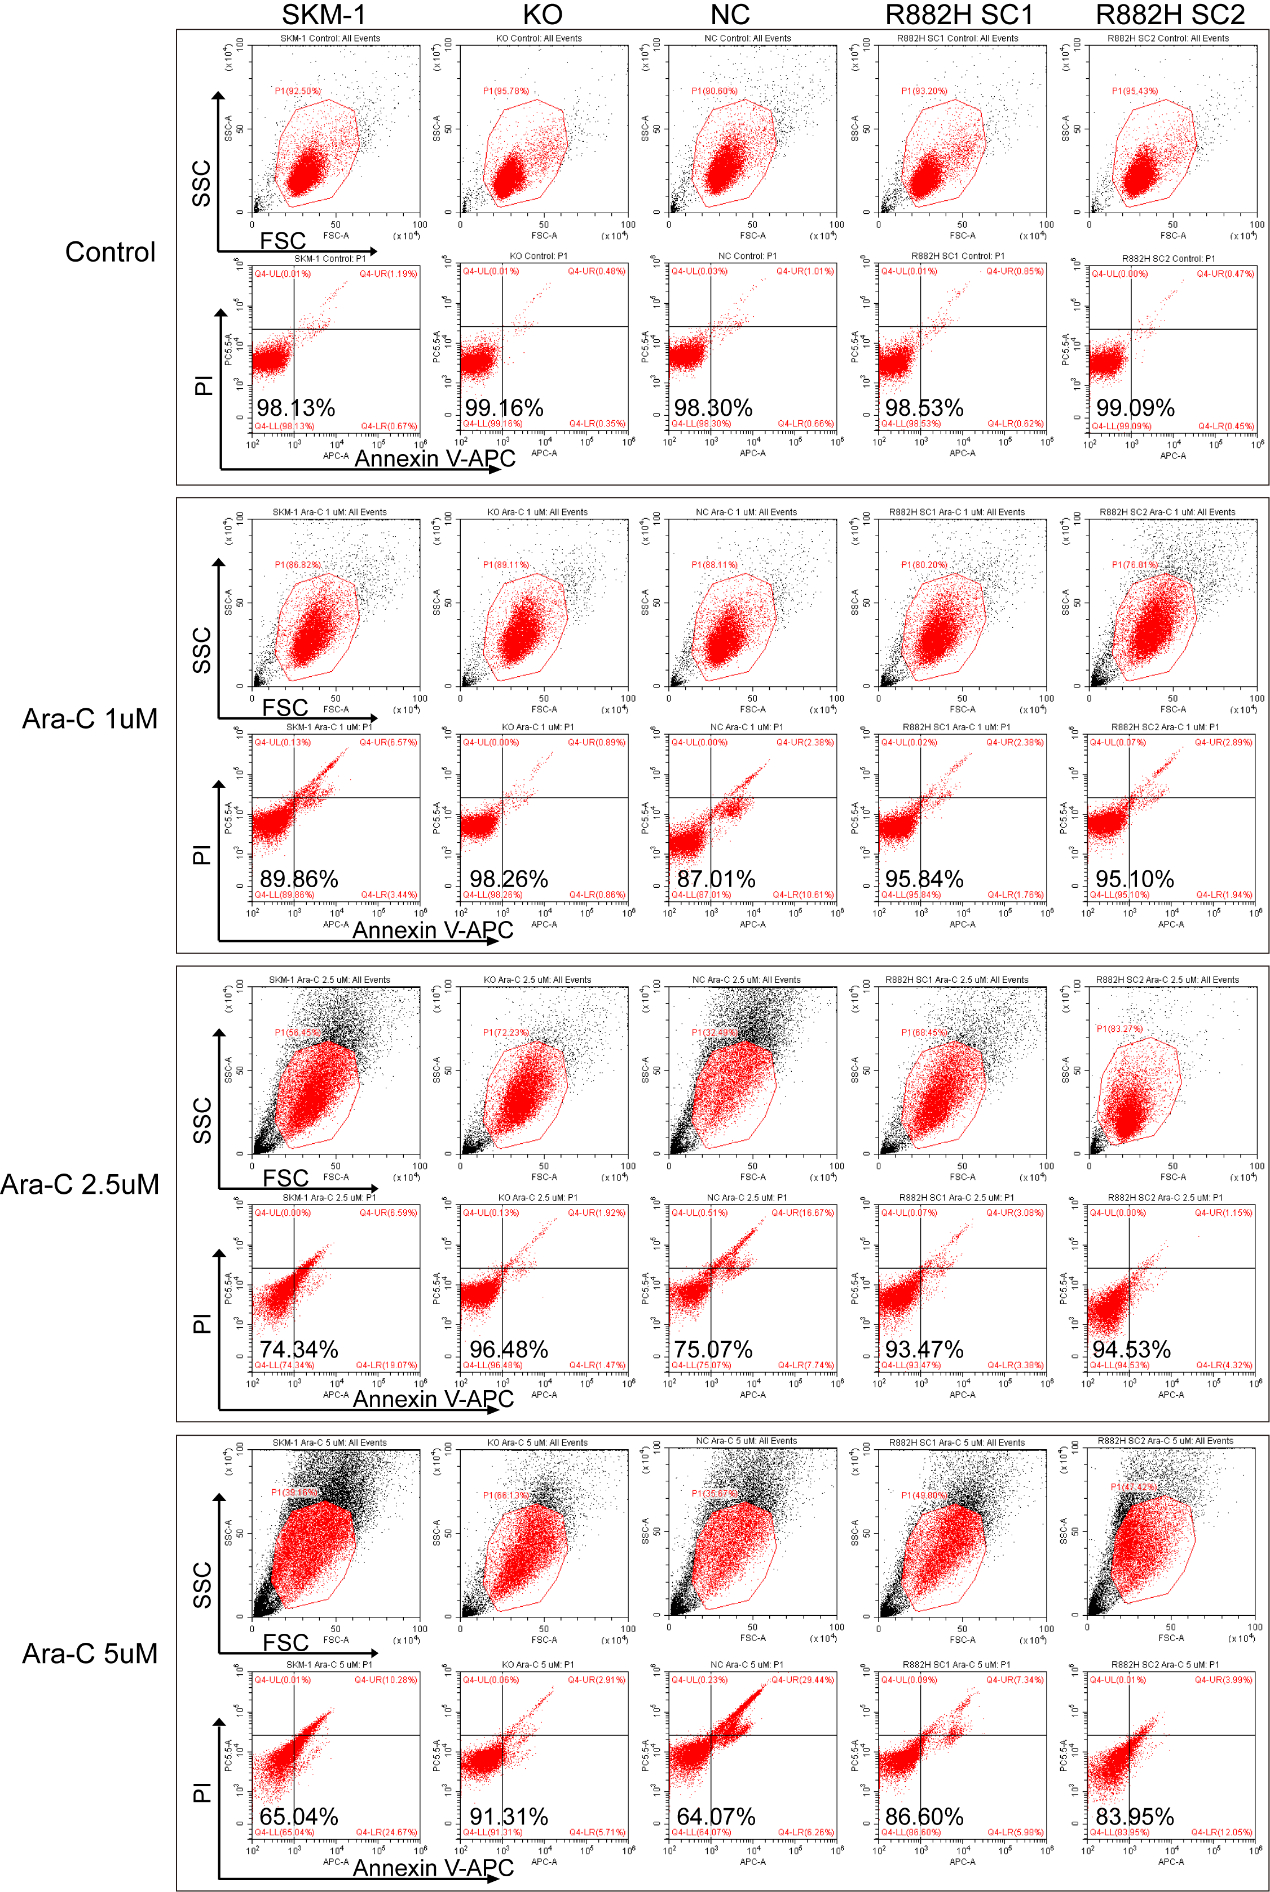


**Figure S1. The apoptosis rate of SKM-1control, SKM-1KO, SKM-1NC, SKM-1R882H SC1 and SKM-1R882H SC2 treated with different concentration of cytarabine.** SKM-1KO, SKM-1R882H SC1 and SKM-1R882H SC2 cells were more resistant to cytarabine than the control group (SKM-1control and SKM-1NC).


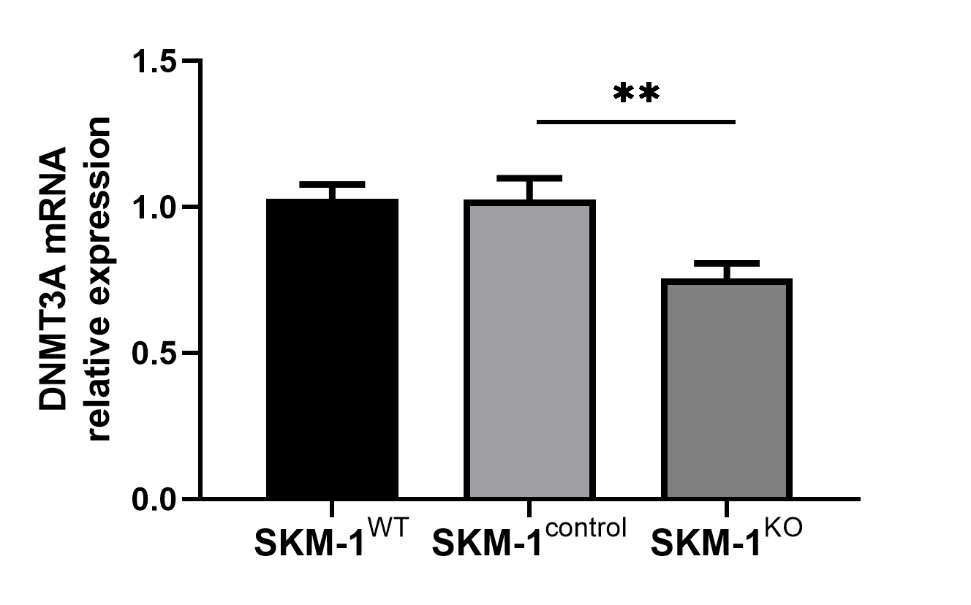


**Figure S2. DNMT3A mRNA expression in SKM-1WT, SKM-1control and SKM-1KO clones.** There was no significant difference of DNMT3A mRNA expression between SKM-1WT clone and SKM-1control clone. DNMT3A mRNA was slightly down-regulated in SKM-1KO clone.


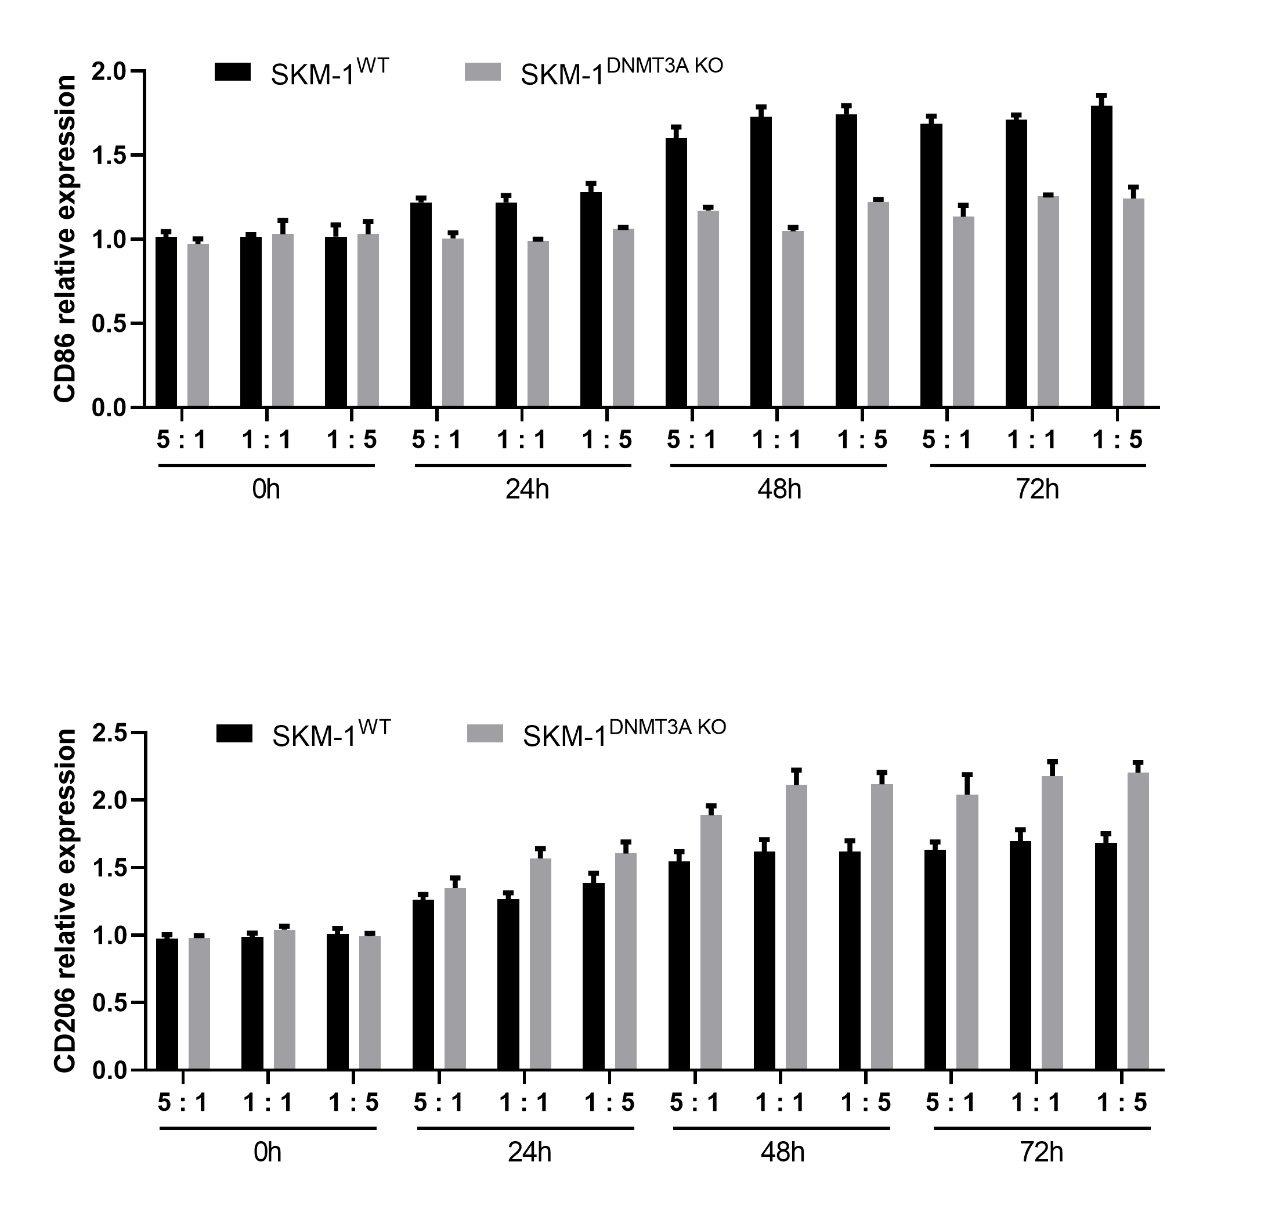


**Figure S3. The time gradients and E: T gradients in vitro co-culture.** SKM-1 cells were co-cultured with macrophages. The expression of CD86 and CD206 in macrophage increased over time. E:T ratio (macrophages: SKM-1 cells) had no significant effect on the result.


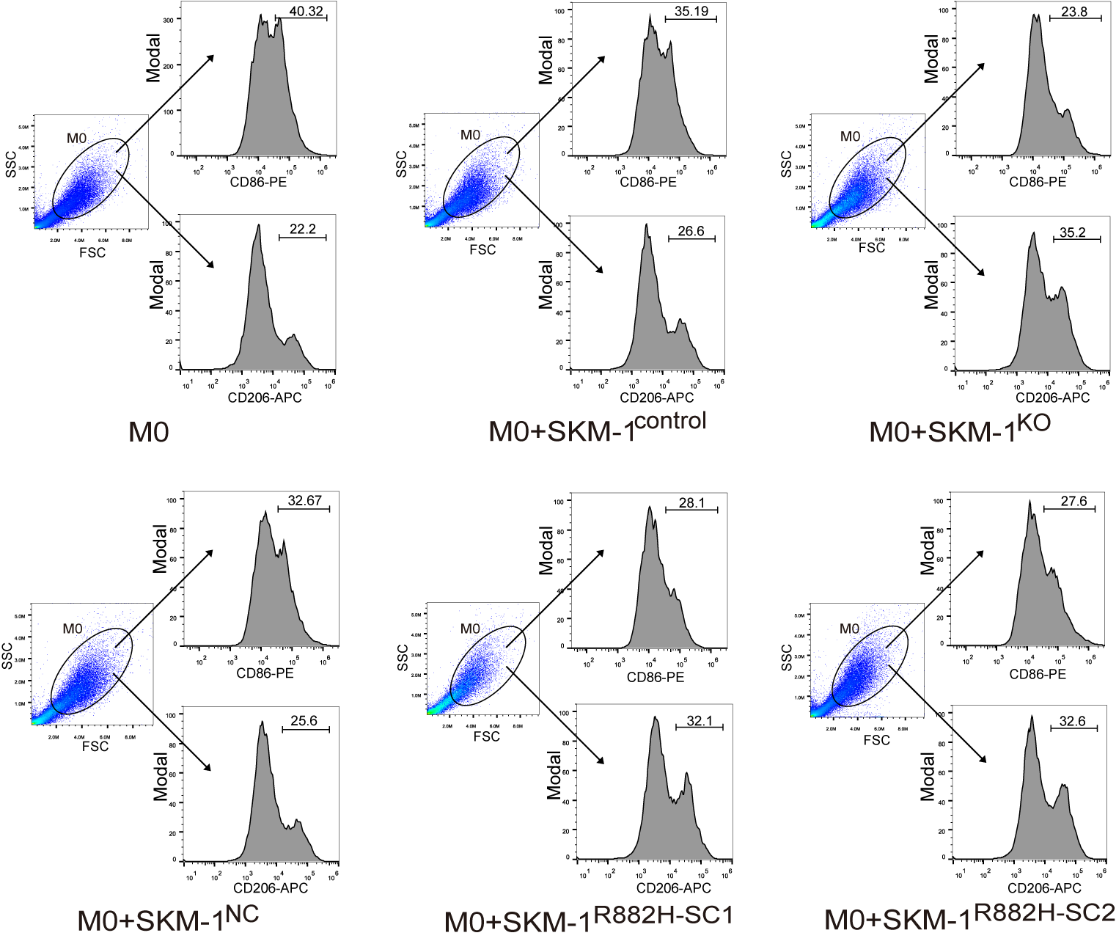


**Figure S4. The expression of CD86 and CD206 in macrophages after co-cultured with AML cells was analyzed using flow cytometry.** There is the raw data of gating strategies and M0 controls of Figure 3E-F.
